# Supplementary material
Source: publisher site journal article supplement (https://www.dovepress.com/article/555955)
Supplement: Supplementary file 1 [file Supplementary%20Tables%20.docx]

Supplementary Table 1. Comparison of socio-demographic and clinical characteristics between the participants who completed the study and those who dropped out

| Characteristics | Completed  (n=104)  Mean (SD) | Dropped out  (n=23)  Mean (SD) | *t*/*χ²*/*z*-value | *p*-value |
| --- | --- | --- | --- | --- |
| Age | 67.56(5.61) | 67.09(7.72) | 2.214a | 0.735 |
| Gender, n (%) |  |  | 0.193b | 0.818 |
| Female | 55(52.9) | 11(47.8) |  |  |
| Male | 49(47.1) | 12(52.2) |  |  |
| Education level, n (%) |  |  | 4.203c | 0.236 |
| Elementary school and below | 33(31.7) | 5(21.7) |  |  |
| Junior high school | 30(28.8) | 5(21.7) |  |  |
| Senior high school | 26(25.0) | 11(47.8) |  |  |
| Technical school or college | 15(14.4) | 2(8.7) |  |  |
| Status of residence, n (%) |  |  | 0.262c | 0.463 |
| Live alone | 13(12.5) | 2(8.7) |  |  |
| Cohabitation | 91(87.5) | 54(91.3) |  |  |
| Monthly income (Chinese Yuan), n (%) |  |  | 1.286c | 0.531 |
| <3000 | 30(28.8) | 4(17.4) |  |  |
| 3000-6000 | 48(46.2) | 12(52.2) |  |  |
| >6000 | 26(25.0) | 7(30.4) |  |  |
| Employment status, n (%) |  |  | 0.917c | 0.638 |
| In-service staff | 30(28.8) | 7(30.4) |  |  |
| Retiree | 46(44.3) | 12(52.2) |  |  |
| Unemployed | 28(26.9) | 4(17.4) |  |  |
| Medical insurance, n (%) |  |  | 0.667c | 0.492 |
| Basic medical insurance for urban employees | 49(47.1) | 13(56.5) |  |  |
| Basic medical insurance for rural and non-working urban residents | 55(52.9) | 10(43.5) |  |  |
| Stroke type, n (%) |  |  | 1.060c | 0.460 |
| Ischemic stroke | 92(88.5) | 22(95.7) |  |  |
| Hemorrhagic stroke | 12(11.5) | 1(4.3) |  |  |
| Family history of stroke, n (%) |  |  | 2.092b | 0.148 |
| Yes | 46(44.2) | 14(60.9) |  |  |
| No | 58(45.7) | 9(39.1) |  |  |
| Course of disease, n (%) |  |  | 5.307c | 0.071 |
| <1 | 42(40.4) | 7(30.4) |  |  |
| 1-6 | 42(40.4) | 15(65.2) |  |  |
| >6 | 20(19.2) | 1(4.3) |  |  |
| Types of medication, n (%) |  |  | 0.098b | 0.754 |
| <5 | 58(55.8) | 12(52.2) |  |  |
| ≥5 | 46(44.2) | 11(47.8) |  |  |
| Frequency of medication use, n (%) |  |  | 0.846c | 0.705 |
| 1 | 38(36.5) | 10(43.5) |  |  |
| 2 | 17(16.3) | 2(8.7) |  |  |
| ≥3 | 49(47.1) | 11(47.8) |  |  |
| Medication guide, n (%) |  |  | 1.202b | 0.343 |
| Yes | 37(35.6) | 11(47.8) |  |  |
| No | 67(64.4) | 12(52.2) |  |  |
| self-care ability, n (%) |  |  | 0.604b | 0.492 |
| Mild dependence | 59(56.7) | 11(47.8) |  |  |
| independent living | 45(43.3) | 12(52.2) |  |  |
| Medication self-management capacity (SAM) | 59.69(5.07) | 58.30(6.41) | 1.130a | 0.219 |
| Capable to self-medicate | 23.28(2.99) | 22.39(3.67) | 1.235a | 0.261 |
| Knowledge about medications | 21.70(1.74) | 21.30(2.20) | 0.943a | 0.348 |
| Experience with self-medication | 14.71(1.18) | 14.61(1.62) | 0.352a | 0.725 |
| Stroke-related knowledge | 24.43(1.41) | 24.30(2.00) | 0.362a | 0.718 |
| Medication literacy (Med Lit Rx SE) | 5.63(1.18) | 5.26(1.39) | 1.300a | 0.196 |
| Medication adherence (MARS-5) | 15.41(1.91) | 15.09(1.35) | 0.778a | 0.438 |
| Systolic blood pressure (mmHg) | 152.47(22.03) | 150.26(16.61) | 0.453a | 0.651 |
| Diastolic blood pressure (mmHg) | 84.20(11.83) | 80.39(9.93) | 1.436a | 0.153 |
| Triglyceride (mmol/L) | 1.33(0.59) | 1.66(0.80) | 2.069a | 0.067 |
| Total Cholesterol (mmol/L) | 3.93(1.09) | 3.69(0.79) | 4.783a | 0.317 |

**Notes** a Independent-test; b Chi-square test, c Fisher’s exact method

**Abbreviations:** SD = Standard Deviation; SAM, Self-Administration of Medication; Med Lit Rx SE, Medication Literacy in Spanish and English; MARS-5, Medication Adherence Self Report Scale.

Supplementary Table 2. GEE analysis of interaction effects of group x time for intention-to-treat and per-protocol analysis

| Outcomes | Intention-to-treat (n = 127) | |  | Per-protocol (n = 104) | |
| --- | --- | --- | --- | --- | --- |
| Group*time | |  | Group*time | |
| 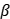 (95% CI) | *p*-value | | 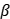 (95% CI) | *p*-value |
| Medication self-management capacity |  |  | |  |  |
| Time 0 | Ref. |  | | Ref. |  |
| Time 1 | 1.41 (0.03, 2.78) | 0.045 | | 1.43 (0.06, 2.73) | 0.041 |
| Time 2 | 2.74 (0.96, 4.53) | 0.003 | | 2.73 (0.86, 4.60) | 0.004 |
| Time 3 | 3.46 (1.18, 5.73) | 0.003 | | 3.37 (1.06, 5.68) | 0.004 |
| Capable to self-medicate |  |  | |  |  |
| Time 0 | Ref. |  | | Ref. |  |
| Time 1 | 0.45 (-0.70, 3.51) | 0.270 | | 0.50 (-0.31, 1.32) | 0.228 |
| Time 2 | 0.98 (0.97, 7.37) | 0.034 | | 1.19 (0.15, 2.23) | 0.025 |
| Time 3 | 1.78 (1.54, 22.80) | 0.010 | | 1.86 (0.50, 3.23) | 0.007 |
| Knowledge about medications |  |  | |  |  |
| Time 0 | Ref. |  | | Ref. |  |
| Time 1 | 0.42 (-0.33, 1.17) | 0.270 | | 0.33 (-0.45, 1.10) | 0.406 |
| Time 2 | 0.52 (-0.28, 1.32) | 0.203 | | 0.45 (-0.34, 1.24) | 0.267 |
| Time 3 | 0.46 (-0.46, 1.38) | 0.330 | | 0.45 (-0.49, 1.39) | 0.351 |
| Experience with self-medication |  |  | |  |  |
| Time 0 | Ref. |  | | Ref. |  |
| Time 1 | 0.52 (-0.32, 1.37) | 0.225 | | 0.50 (-0.38, 1.39) | 0.265 |
| Time 2 | 1.19 (2.20, 5.34) | 0.021 | | 1.09 (0.22, 2.19) | 0.041 |
| Time 3 | 1.14 (0.01, 2.27) | 0.048 | | 1.13 (0.01, 2.28) | 0.049 |
| Stroke-related knowledge |  |  | |  |  |
| Time 0 | Ref. |  | | Ref. |  |
| Time 1 | 0.81 (-0.35, 1.97) | 0.172 | | 0.83 (-0.38, 2.04) | 0.176 |
| Time 2 | 2.67 (1.11, 4.24) | <0.001 | | 2.84 (1.23, 4.44) | <0.001 |
| Time 3 | 3.97 (1.77, 6.17) | <0.001 | | 4.40 (2.24, 6.55) | <0.001 |
| Medication literacy |  |  | |  |  |
| Time 0 | Ref. |  | | Ref. |  |
| Time 1 | 0.46 (-0.06, 0.98) | 0.082 | | 0.55 (-0.08, 1.11) | 0.054 |
| Time 2 | 1.22 (0.68, 1.77) | <0.001 | | 1.25 (0.68, 1.83) | <0.001 |
| Time 3 | 1.18 (0.57, 1.79) | <0.001 | | 1.25 (0.62, 1.88) | <0.001 |
| Medication adherence |  |  | |  |  |
| Time 0 | Ref. |  | | Ref. |  |
| Time 1 | 0.50 (-0.40, 1.41) | 0.278 | | 0.40 (-0.64, 1.43) | 0.451 |
| Time 2 | 1.07 (0.08, 2.06) | 0.034 | | 1.09 (0.037, 2.15) | 0.042 |
| Time 3 | 1.45 (0.31, 2.60) | 0.013 | | 1.41 (0.22, 2.60) | 0.021 |

Abbreviations: GEE = generalized estimating equation; CI = confidence interval, lower, upper
